# Supplementary material for: Common concerns, barriers to care, and the lived experience of individuals with hepatitis B: a qualitative study
Source: BMC Public Health. 2021 May 28;21:1004. doi: 10.1186/s12889-021-11093-0 (PMC8161662; doi:10.1186/s12889-021-11093-0)
Supplement: Supplementary file 1 — Additional file 1:. Data Information Collection for Codebook. [file 12889_2021_11093_MOESM1_ESM.docx]

**Title:** Common concerns, barriers to care, and the lived experience of individuals with hepatitis B: A qualitative study

**Authors:**

Catherine Freeland, MPH,1,2 [Catherine.Freeland@hepb.org](mailto:Catherine.Freeland@hepb.org), *(corresponding author)*

Sean Farrell, BA, 2,3 [sean.farrell@jefferson.edu](mailto:sean.farrell@jefferson.edu)

Priyanka Kumar, MD, MPH, 2,4 [pxk039@jefferson.edu](mailto:pxk039@jefferson.edu)

Maureen Kamischke, BS, 1 [maureen.kamischke@hepb.org](mailto:maureen.kamischke@hepb.org)

Michaela Jackson, MS, 1 [michaela.jackson@hepb.org](mailto:michaela.jackson@hepb.org)

Sierra Bodor, BS, 1 [sierra.bodor@hepb.org](mailto:sierra.bodor@hepb.org)

Timothy M. Block, PhD, 1 [tim.block@bblumberg.org](mailto:tim.block@bblumberg.org)

Rosemary Frasso PhD, MSc, CPH, 2 [Rosie.Frasso@jefferson.edu](mailto:Rosie.Frasso@jefferson.edu)

Chari Cohen, DrPH, MPH, 1 [Chari.Cohen@hepb.org](mailto:Chari.Cohen@hepb.org)

**Author Affiliations:**

1Hepatitis B Foundation, 3805 Old Easton Rd. Doylestown, PA 18902,

2Thomas Jefferson University College of Population Health, Philadelphia, PA 19107

3Geisinger Commonwealth School of Medicine in Scranton, PA 18510

4Sidney Kimmel Medical College, Thomas Jefferson University, Philadelphia, PA 19107

**Data Information Collection for Codebook**

| **Code** | **Definition** |
| --- | --- |
| Diagnosis | Use when individual shares or asks questions about hepatitis B and/or D test results or other diagnostic-related questions (e.g. provides lab report, or lists out lab results, acute vs. chronic) |
| Transmission | Use when questions asked about next steps for after an exposure or risk of possible exposure, or transmission of infection to others (i.e.- sex, needle stick, mother to child, blood exposure), or a general question/comment about how hepatitis B/D is transmitted |
| Vaccination/Prevention | Use when there is anything to do with vaccination or hepatitis B/D prevention or prevention of transmission from occurring, |
| Healthy lifestyle | Use when discussing exercise or eating healthily while living with hepatitis B & D, any questions related to living with hepatitis B – including questions about what to avoid, maintaining a healthy lifestyle, healthy liver, things to avoid. |
| Alternative therapies | Use when there is discussion of herbals, supplements, prayer, vitamins, or other therapies for hepatitis B that are not FDA approved |
| Finding Doctor | Use when individual is asking about finding a doctor or liver specialist in their area |
| Medication access | Use when individual is asking about medication access help or financing medication, need for medication or questions related to medication, prescription needs, guidelines on who needs medication, |
| Pregnancy | Use when correspondence involves either an infected mother or father with hepatitis B and/or hepatitis D, or recently pregnant individual, discussion about prevention mother to child transmission |
| Discrimination | Use when any type of **institutional discrimination** is involved in conversation, can be related to employment, visa, school etc. |
| Symptoms | Use when symptoms of hepatitis B and D are discussed (jaundice, fever, flu like symptoms, itching, side pain, fatigue) |
| Liver Cancer & Liver Damage | Use when **liver cancer and/or cirrhosis, fibrosis** (scarring of the liver, fibro-scan (F4)) is discussed related to hepatitis B and D |
| Location | Use when any location of individual is discussed |
| Cure or Clearing the Virus | Use when discussion of hepatitis B/D cure is discussed or possibility of clearing the virus naturally |
| Stigma | Use when **discussion of being treated differently by peers/individuals** due to hepatitis B and D, talking about their disease status or fear of social stigma related to discussing positive test results. |
| Quality of Life | Use when **emotions** related to mood, mental health, quality of life are expressed (ie. feelings of depression, hopelessness or happiness, suicide, fear of death, optimism, stress, worry, concern) |
| Treatment | Use when asking about methods for treatment of hepatitis B or D, side effects, duration of treatment, liver transplant |
| Clinical Trials | Use when correspondence involves questions about participating in clinical trials or questions about clinical trails |
| Barriers | Use when discussing barriers to treatment, medical care, general cost, poverty. |
| General Question | Use when individual is asking a general question related to hepatitis B/D- what is hepatitis D? |
